# Supplementary material for: Occupational exposure to diesel exhausts and liver and pancreatic cancers: a systematic review and meta-analysis
Source: Springer Nature journal article supplement (doi:10.1007/s10654-024-01099-4), 2024-01-30

## **SUPPLEMENTARY MATERIAL**

### **Occupational exposure to diesel exhausts and liver and pancreatic cancers: a systematic review and meta-analysis**

Michele Sassano<sup>1</sup>, Giulia Collatuzzo<sup>1</sup>, Federica Teglia<sup>1</sup>, Paolo Boffetta<sup>1,2,3</sup>

<sup>1</sup> Department of Medical and Surgical Sciences, University of Bologna, Bologna, Italy.

<sup>2</sup> Stony Brook Cancer Center, Stony Brook University, Stony Brook, New York, USA.

<sup>3</sup> Department of Family, Population and Preventive Medicine, Renaissance School of Medicine, Stony Brook University, Stony Brook, NY, USA

Correspondence:

Paolo Boffetta

Department of Medical and Surgical Sciences, University of Bologna, Bologna, Italy.

[paolo.boffetta@unibo.it](mailto:paolo.boffetta@unibo.it)

**Supplementary Table 1.** Modified version of the Critical Appraisal Skills Programme (CASP) checklist for cohort studies used for quality assessment.

**Supplementary Figure 1.** Leave-one-out meta-analysis for the association between occupational exposure to diesel exhausts and liver and biliary tract cancer incidence and mortality combined.

**Supplementary Figure 2.** Leave-one-out meta-analysis for the association between occupational exposure to diesel exhausts and pancreatic cancer incidence and mortality combined.

**Supplementary Table 1.** Modified version of the Critical Appraisal Skills Programme (CASP) checklist for cohort studies used for quality assessment.

| Items                                                                                   | Possible scores         |
|-----------------------------------------------------------------------------------------|-------------------------|
| <b>Section A: Are the results of the study valid?</b>                                   |                         |
| 1. Did the study address a clearly focused issue?                                       | - 1.5<br>- 1.0<br>- 0.0 |
| 2. Was the cohort recruited in an acceptable way?                                       | - 1.5<br>- 1.0<br>- 0.0 |
| 3. Was the exposure accurately measured to minimise bias?                               | - 1.0<br>- 0.5<br>- 0.0 |
| 4. Was the outcome accurately measured to minimise bias?                                | - 1.0<br>- 0.5<br>- 0.0 |
| 5.(a) Have the authors identified all important confounding factors?                    | - 1.0<br>- 0.5<br>- 0.0 |
| 5.(b) Have they taken account of the confounding factors in the design and/or analysis? | - 1.0<br>- 0.5<br>- 0.0 |
| 6.(a) Was the follow up of subjects complete enough?                                    | - 1.0<br>- 0.5<br>- 0.0 |
| 6. (b) Was the follow up of subjects long enough?                                       | - 1.0<br>- 0.5<br>- 0.0 |
| <b>Section B: What are the results?</b>                                                 |                         |
| 7. What are the results of this study?                                                  | Excluded                |
| 8. How precise are the results?                                                         | - 1.0<br>- 0.5<br>- 0.0 |
| 9. Do you believe the results?                                                          | - 1.0<br>- 0.5<br>- 0.0 |
| <b>Section C: Will the results help locally?</b>                                        |                         |
| 10. Can the results be applied to the local population?                                 | - 1.0<br>- 0.5<br>- 0.0 |
| 11. Do the results of this study fit with other available evidence?                     | - 1.0<br>- 0.5<br>- 0.0 |
| 12. What are the implications of this study for practice?                               | - 1.0<br>- 0.5<br>- 0.0 |

For each item, scores were assigned according to researchers' consideration of the quality of the content (higher score means higher quality).

**Supplementary Figure 1.** Leave-one-out meta-analysis for the association between occupational exposure to diesel exhausts and liver and biliary tract cancer incidence and mortality combined.

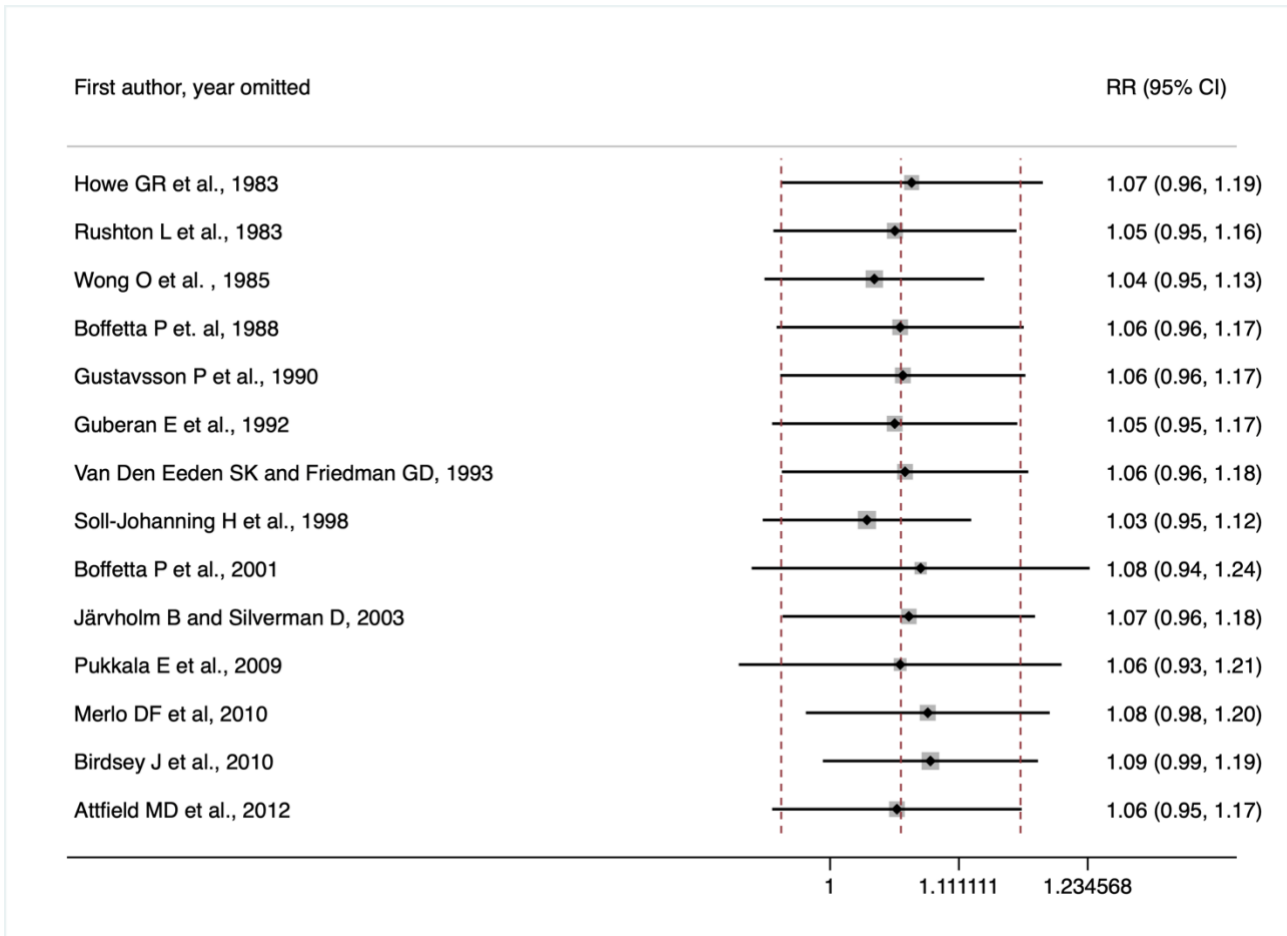

**Supplementary Figure 2.** Leave-one-out meta-analysis for the association between occupational exposure to diesel exhausts and pancreatic cancer incidence and mortality combined.

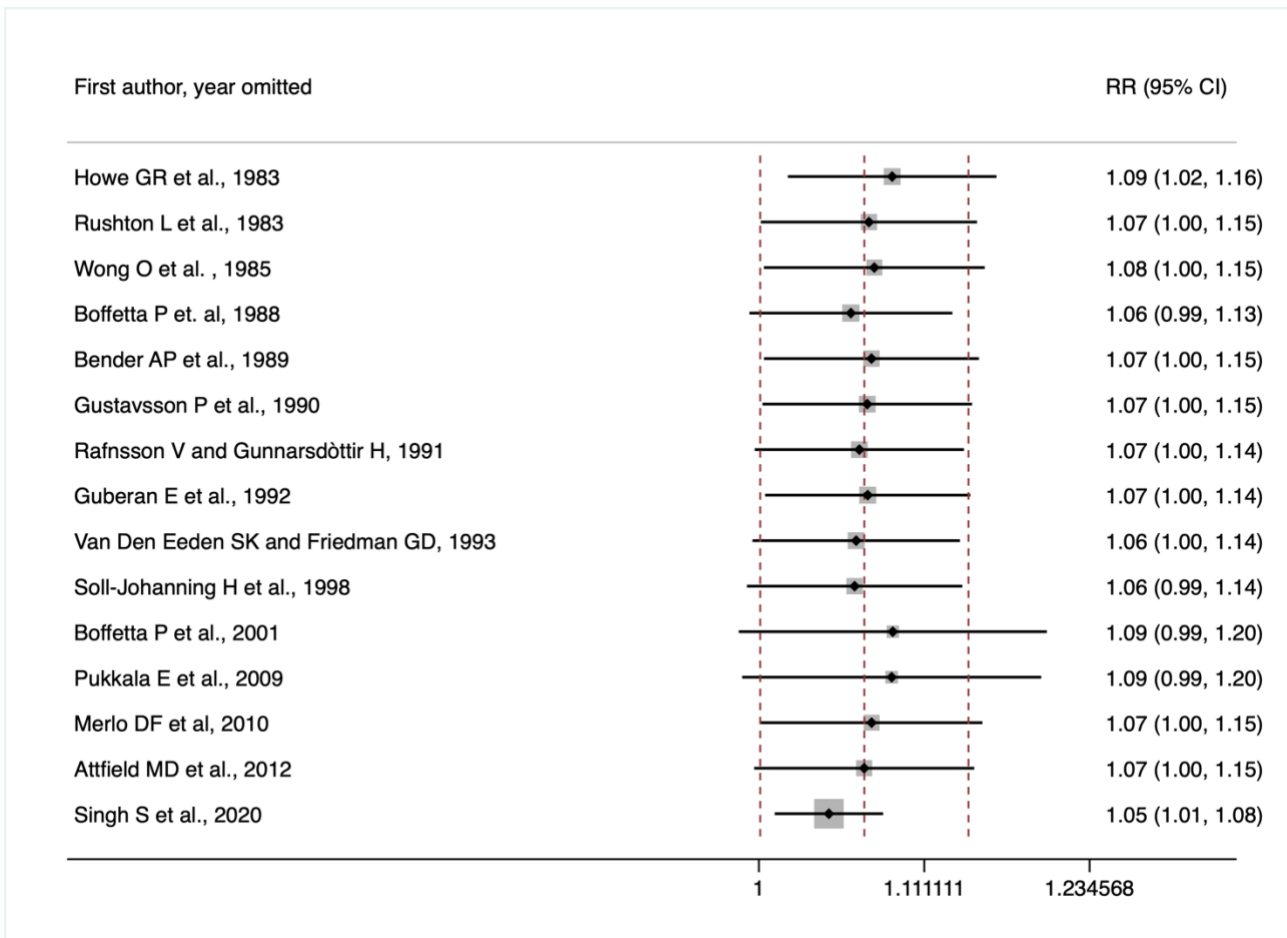

Supplement: MOESM1 [file 10654_2024_1099_MOESM1_ESM.pdf]
